# Supplementary material for: Effect of Odor-Treatment Biofilter on Bioaerosols from an Indoor Wastewater Treatment Plant
Source: MDPI journal article supplement (doi:10.3390/atmos13101723), 2022-10-20
Supplement: s1 [file s1]

# Effect of odor-treatment biofilter on bioaerosols from an indoor wastewater treatment plant

Amélia Bélanger Cayouette, Arthur Ouradou, Marc Veillette, Nathalie Turgeon, Paul B. L. George,  
Stéphane Corbin, Christian Boulanger, Caroline Duchaine, Emilie Bédard\*

## Supplemental Material

Figure S1: Detailed schematic of the air sampling before and after the biofilter

Table S1: Sequence of primers and probes used for targeted 16S, ARGs and MGEs

Table S2. Plasmid sequence used for qPCR detection of targeted ARGs and MGEs

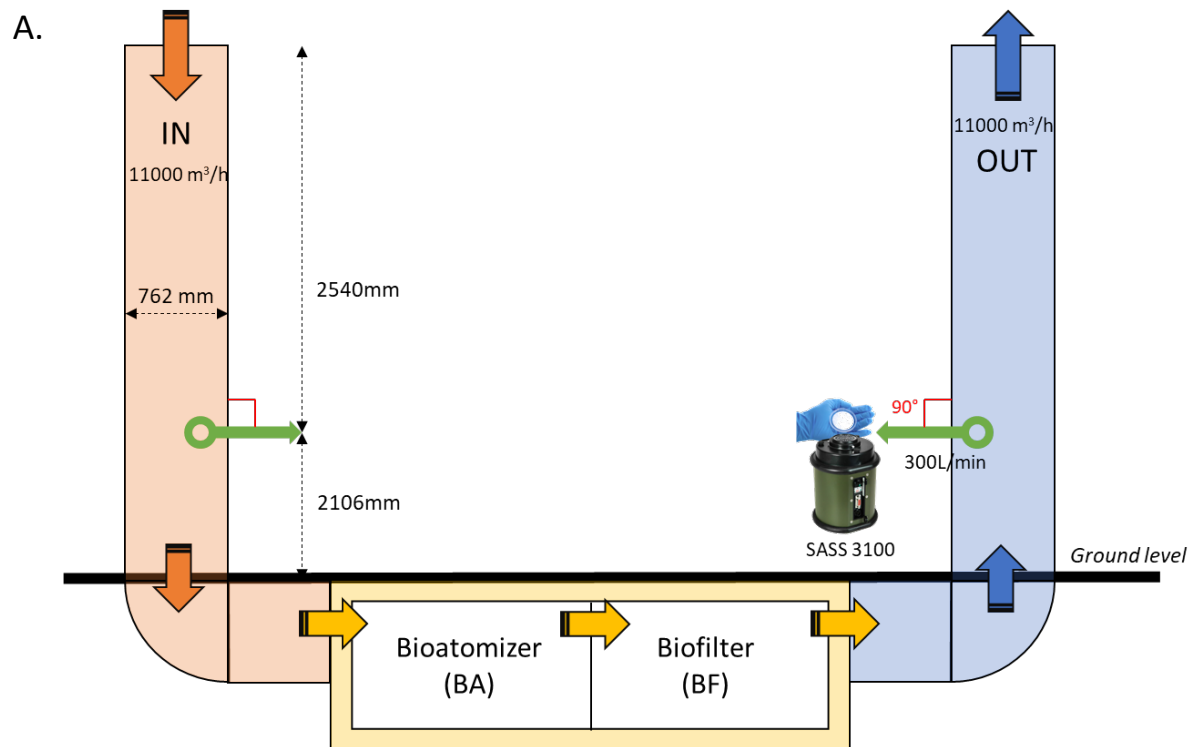

B.

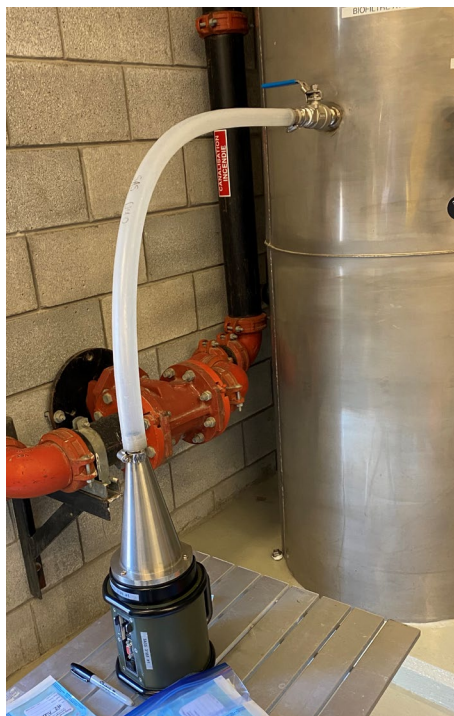

Figure S1. Detailed schematic of the air sampling before and after the biofilter (A) and sampler connection to the air channel (B)

Table S1. Sequence of primers and probes used for targeted 16S, ARGs and MGEs

| Target gene | Gene ID (Stedtfeld et al. 2018)  | Sequence of primers and probes                                                                                                        |
|-------------|----------------------------------|---------------------------------------------------------------------------------------------------------------------------------------|
| 16S rRNA    | 16S rRNA                         | Forward: GAC ARC CAT GCA SCA CCT G<br>Reverse: GGT AGT CYA YGC MST AAA CG<br>Probe: FAM/TKC GCG TTG/ZEN/CDT CGA ATT AAW CCA C/3IABkFQ |
| aac(6')-II  | aac(6')-II (8)                   | Forward : CGACCCGACTCCGAACAA<br>Reverse: GCACGAATCCTGCCTTCTCA                                                                         |
| aac(6')-Ib  | aac(6')-Ib (95)                  | Forward: CGTCGCCGAGCAACTTG<br>Reverse: CCGTACCTTGCCCTCTCAAACC                                                                         |
| aac(3)      | aac(3)-iid_iii_iif_iaa_iae (410) | Forward: CGATGGTCGCGGTTGGTC<br>Reverse: TCGGCGTAGTGCAATGCG                                                                            |
| blaCMY2     | blaCMY2 (108)                    | Forward: AAAGCCTCATGGGTGCATAAA<br>Reverse: ATAGCTTTTGTTCGCCAGCATCA                                                                    |
| blaGES      | blaGES (120)                     | Forward: GCAATGTGCTCAACGTTCAAG<br>Reverse: GTGCCTGAGTCAATTCTTTCAAAG                                                                   |
| blaVEB      | blaVEB (38)                      | Forward: CCCGATGCAAAGCGTTATG<br>Reverse: GAAAGATTCCCTTTATCTATCTCAGACAA                                                                |
| blaTEM      | blaTEM (164)                     | Forward: AGCATCTTACGGATGGCATGA<br>Reverse: TCCTCCGATCGTTGTCAGAAAGT                                                                    |
| blaVIM      | blaVIM (147)                     | Forward: GCACTTCTCGCGGAGATTG<br>Reverse: CGACGGTGATGCGTACGTT                                                                          |
| blaIMP      | blaIMP (324)                     | Forward: GGAATAGAGTGGCTTAATTC<br>Reverse: GGTTAACAAAACAACCACC                                                                         |
| blaMOX      | blaMOX (34)                      | Forward: CTATGTCAATGTGCCGAAGCA<br>Reverse: GGCTTGTCCTCTTTCGAATAGC                                                                     |
| blaSHVII    | blaSHVII (1110)                  | Forward: TTGACCGCTGGGAAACGG<br>Reverse: TCCGGTCTTATCGGCGATAAAC                                                                        |
| blaOXA      | blaOXA (1506)                    | Forward: CGCAATTATCGGCCTAGAAACT<br>Reverse: TTGGCTTTCCGTCCCATTT                                                                       |
| blaCTX-M-1  | blaCTX-M-1 (Pas dans l'article)  | Forward: CGG GCR ATG GCG CAR AC<br>Reverse: TGC RCC GGT SGT ATT GCC<br>Probe: FAM/CCA RCG GGC/ZEN/GCA GYT GGT GAC/3IABkFQ             |
| ermB        | ermB (804)                       | Forward: GAACACTAGGGTTGTTCTTGCA<br>Reverse: CTGGAACATCTGTGGTATGGC                                                                     |
| ermF        | ermF (23)                        | Forward: CAGCTTTGGTTGAACATTTACGAA<br>Reverse: AAATTCCTAAAATCACAACCGACAA                                                               |
| ermT        | ermT (137)                       | Forward: GTTCACTAGCACTATTTTAAATGACAGAAGT<br>Reverse: GAAGGGTGTCTTTTAAATACAATTAACGA                                                    |
| ermX        | ermX (209)                       | Forward: GCTCAGTGGTCCCCATGGT<br>Reverse: ATCCCCCGTCAACGTT                                                                             |
| erm35       | erm35 (815)                      | Forward: CCTTCAGTCAGAACCGGCAA<br>Reverse: GCTGATTGACAGTTGGTGGTG                                                                       |
| tet32       | tet32 (54)                       | Forward: CCATTACTTCGGACAACGGTAGA<br>Reverse: CAATCTCTGTGAGGGCATTTAACA                                                                 |
| tetA        | tetA (180)                       | Forward: CTCACCAGCCTGACCTCGAT<br>Reverse: CACGTTGTTATAGAAGCCGCATAG                                                                    |
| tetL        | tetL (195)                       | Forward: ATGGTTGTAGTTGCGCGCTATAT<br>Reverse: ATCGCTGGACCGACTCCTT                                                                      |

|        |                            |                                                                                                                      |
|--------|----------------------------|----------------------------------------------------------------------------------------------------------------------|
| tetO   | tetO (192)                 | Forward: CAACATTAACGGAAAGTTTATTGTATACCA<br>Reverse: TTGACGCTCCAAATTCATTGTATC                                         |
| tetQ   | tetQ (185)                 | Forward: CGCCTCAGAAAGTAAGTTCATACACTAAG<br>Reverse: TCGTTCATGCGGATATTATCAGAAT                                         |
| tetS   | tetS (200)                 | Forward: TTAAGGACAAACTTTCTGACGACATC<br>Reverse: TGTCTCCCATTGTTCTGGTTCA                                               |
| tetW   | tetW (191)                 | Forward: ATGAACATTCCCACCGTTATCTTT<br>Reverse: ATATCGGCGGAGAGCTTATCC                                                  |
| tetX   | tetX (196)                 | Forward: AAATTTGTTACCGACACGGAAGTT<br>Reverse: CATAGCTGAAAAAATCCAGGACAGTT                                             |
| tetM   | tetM (1513)                | Forward: GGAGCGATTACAGAATTAGGAAGC<br>Reverse: TCCATATGTCCTGGCGTGTCT                                                  |
| vanA   | vanA (1514)                | Forward: GGGCTGTGAGGTCGGTTG<br>Reverse: TTCAGTACAAATGCGGCCGTTA                                                       |
| vanB   | vanB (211)                 | Forward: TTGTCGGCGAAGTGGATCA<br>Reverse: AGCCTTTTTCCGGCTCGTT                                                         |
| vanRA  | vanRA (216)                | Forward: CCCTTACTCCCACCGAGTTTT<br>Reverse: TTCGTCGCCCCATATCTCAT                                                      |
| vanSA  | vanSA (218)                | Forward: CGCGTCATGCTTTCAAAATTC<br>Reverse: TCCGCAGAAAGCTCAATTTGTT                                                    |
| sul1   | sul1 (363)                 | Forward: GCCGATGAGATCAGACGTATTG<br>Reverse: CGCATAGCGCTGGGTTTC                                                       |
| sul2   | sul2 (133)                 | Forward: TCATCTGCCAACTCGTCGTTA<br>Reverse: GTCAAAGAACGCCGCAATGT                                                      |
| qnrB   | qnrB (1202)                | Forward: TCACCACCCGCACCTG<br>Reverse: GGATATCTAAATCGCCCAGTCC                                                         |
| mcr-1  | mcr-1 (pas dans l'article) | Forward: ATGGCACGGTCTATGATA<br>Reverse: CGGATAATCCACCTTAACA<br>Probe: FAM/CTA CAG ACC/ZEN/GAC CAA GCC GA/3IABkFQ/-3' |
| is26   | is26 (1546)                | Forward: ATGGATGAAACCTACGTGAAGGTC<br>Reverse: CGGTACTTAATCTGTCGGTGTTCA                                               |
| tnpA   | tnpA (207)                 | Forward: AATTGATGCGGACGGCTTAA<br>Reverse: TCACCAAACTGTTTATGGAGTCGTT                                                  |
| int1-A | int1-A (336)               | Forward: CGAAGTCGAGGCATTTCTGTC<br>Reverse: GCCTTCCAGAAAACCGAGGA                                                      |

Stedtfeld, R.D., Guo, Xueping, Stedtfeld, Tiffany M., Sheng, Hongjie, Williams, Maggie R., Hauschild, Kristin, Gunturu, Santosh, Tift, Leo, Wang, Fang, Howe, Adina, Chai, Benli, Yin, Daqiang, Cole, James R., Tiedje, James M., Hashsham, Syed A., Primer set 2.0 for highly parallel qPCR array targeting antibiotic resistance genes and mobile genetic elements. FEMS Microbiology Ecology, 2018. 94(9)

Table S2. Plasmid sequence used for qPCR detection of targeted ARGs and MGEs

| Gene                                          | Plasmid sequence for qPCR detection                                                                                                                                                                                                                                                                                                                                                                                                                                                                                                                                                                                                                                                                                                                                                                                                                                                                                                                                                                                                                                                                                                                                                                                                                                                                                                                                                                                                                                                                                                                                                                                                                                                                   |
|-----------------------------------------------|-------------------------------------------------------------------------------------------------------------------------------------------------------------------------------------------------------------------------------------------------------------------------------------------------------------------------------------------------------------------------------------------------------------------------------------------------------------------------------------------------------------------------------------------------------------------------------------------------------------------------------------------------------------------------------------------------------------------------------------------------------------------------------------------------------------------------------------------------------------------------------------------------------------------------------------------------------------------------------------------------------------------------------------------------------------------------------------------------------------------------------------------------------------------------------------------------------------------------------------------------------------------------------------------------------------------------------------------------------------------------------------------------------------------------------------------------------------------------------------------------------------------------------------------------------------------------------------------------------------------------------------------------------------------------------------------------------|
| <i>16S rDNA</i>                               | AAATTGAAGAGTTTGATCATGGCTCAGATTGAACGCTGGCGGCAGGCCTAACACATGCA<br>AGTCGAACGGTAACAGGAAGAAGCTTGCTCTTTGCTGACGAGTGGCGGACGGGTGAGTA<br>ATGTCTGGGAAACTGCCTGATGGAGGGGGATAACTACTGGAAACGGTAGCTAATACCGC<br>ATAACGTCGCAAGACCAAAGAGGGGGACCTTCGGGCCTCTTGCCATCGGATGTGCCAG<br>ATGGGATTAGCTAGTAGGTGGGGTAACGGCTCACCTAGGCGACGATCCCTAGCTGGTCT<br>GAGAGGATGACCAGCCACACTGGAACAGAGACACGGTCCAGACTCCTACGGGAGGCAG<br>CAGTGGGGAATATTGCACAATGGGCGCAAGCCTGATGCAGCCATGCCGCGTGTATGAAG<br>AAGGCCTTCGGGTGTAAAGTACTTTCAGCGGGGAGGAAGGGAGTAAAGTTAATACCTT<br>TGCTCATTGACGTTACCCGCAGAAGAAGCACC GGCTAACTCCGTGCCAGCAGCCGCGGT<br>AATACGGAGGGTGCAAGCGTTAATCGGAATTACTGGGCGTAAAGCGCACGCAGGCGGTT<br>TGTTAAGTCAGATGTGAAATCCCCGGGCTCAACCTGGGAACTGCATCTGATACTGGCAA<br>GCTTGAGTCTCGTAGAGGGGGGTAGAATTCAGGTGTAGCGGTGAAATGCGTAGAGATC<br>TGGAGGAATACCGGTGGCGAAGGCGGCCCTTGACGAAGACTGACGCTCAGGTGCGA<br>AAGCGTGGGGAGCAAACAGGATTAGATACCCTGGTAGTCCACGCCGTAAACGATGTCG<br>ACTTGAGGTTGTGCCCTTGAGGCGTGGCTTCCGGAGCTAACGCGTTAAGTCGACCGCCT<br>GGGGAGTACGGCCGCAAGGTTAAACTCAAATGAATTGACGGGGGCCCGCACAAAGCGG<br>TGGAGCATGTGGTTTAATTCGATGCAACGCGAAGAACCTTACCTGGTCTTGACATCCACG<br>GAAGTTTTAGAGATGAGAATGTGCCTTCGGGAACCGTGAGACAGGTGCTGCATGGCTG<br>TCGTCAGCTCGTGTGTGAAATGTTGGGTAAAGTCCCGCAACGAGCGCAACCCCTATCCT<br>TTGTTGCCAGCGGTCCGGCCGGGAACTCAAAGGAGACTGCCAGTGATAAACTGGAGGAA<br>GGTGGGGATGACGTCAAGTCATCATGGCCCTTACGACCAGGGCTACACACGTGCTACAA<br>TGGCGCATACAAAGAGAAGCGACCTCGCGAGAGCAAGCGGACCTCATAAAGTGCCTCG<br>TAGTCCGATTGGAGTCTGCAACTCGACTCCATGAAGTCGGAATCGCTAGTAATCGTGGA<br>TCAGAAATGCCACGGTGAATACGTTCCCGGGCCTGTACACACCGCCCGTCACACCATGG<br>GAGTGGGTTGAAAAGAAGTAGGTAGCTTAACCTTCGGGAGGGCGCTTACCACCTTTGTG<br>ATTCATGACTGGGGTGAAGTCGTAACAAGGTAACCGTAGGGGAACCTGCGGTTGGATCA<br>CCTCCTTA |
| <i>aac(6')-II</i>                             | ATCTTCTCCCGCACGAATCCTGCCTTCTCATAGCAGCGTATGGCTCGATGGTTGTTCCGAG<br>TCGGGTCCGTCTGAATCT                                                                                                                                                                                                                                                                                                                                                                                                                                                                                                                                                                                                                                                                                                                                                                                                                                                                                                                                                                                                                                                                                                                                                                                                                                                                                                                                                                                                                                                                                                                                                                                                                   |
| <i>aac(6')-Ib</i>                             | TTAGGCATCACTGCGTGTTTCGCTCGAATGCCTGGCGTGTTTGAACCATGTACACGGCTGG<br>ACCATATGGGGTGGTTA                                                                                                                                                                                                                                                                                                                                                                                                                                                                                                                                                                                                                                                                                                                                                                                                                                                                                                                                                                                                                                                                                                                                                                                                                                                                                                                                                                                                                                                                                                                                                                                                                    |
| <i>aac(3)-<br/>iid_iii_iiif_ii<br/>a_iiie</i> | CTAACCTGAAGGCTCGAAGAGCGCTCGACGGCCTCGTGCGGAGGCACGATCGGAGTG<br>GTTCCGAAATGCTTCTCAA<br>GATAGGTGACGCCGAACGTCACGATGTCCTGCGCGTCGAACAGGTAGCACTGAGCAAA<br>GCCCACGACACCTTCTCGAT<br>GGCGACCGAGCTTACGTAAGCATTTGCTATAGTTTCAACCGCATCCGGCTTTCCTTCGAT<br>AGCAAAGCAATCGAGAATG<br>CCGTTTGAATCGTAATCCGATGCCGTTTTCCAGGCGACTTCACCGTCTCTTCCAAGCATCG<br>GCATCTCATACGTCACCCAC<br>CGTTTGTTGGGGATATCGGCAACCGCC                                                                                                                                                                                                                                                                                                                                                                                                                                                                                                                                                                                                                                                                                                                                                                                                                                                                                                                                                                                                                                                                                                                                                                                                                                                                                                                 |
| <i>bla<sub>CMY2</sub></i>                     | CCCCGAGTGAAAGCCTCATGGGTGCATAAAACGGGCTCCACTGGTGGATTTGGCAGCT<br>ACGTAGCCTTCGTTCCAGAAAAA<br>AACCTTGGCATCGTGATGCTGGCAAACAAAAGCTATCCTAACCCTG                                                                                                                                                                                                                                                                                                                                                                                                                                                                                                                                                                                                                                                                                                                                                                                                                                                                                                                                                                                                                                                                                                                                                                                                                                                                                                                                                                                                                                                                                                                                                               |
| <i>bla<sub>GES</sub></i>                      | GCAGCGTTTTGCAATGTGCTCAACGTTCAAGTTTCCGCTAGCCGCGCTGGTCTTTGAAAG<br>AATTGACTCAGGCACCGAGCGGGGG                                                                                                                                                                                                                                                                                                                                                                                                                                                                                                                                                                                                                                                                                                                                                                                                                                                                                                                                                                                                                                                                                                                                                                                                                                                                                                                                                                                                                                                                                                                                                                                                             |
| <i>bla<sub>VEB</sub></i>                      | ACTTCCATTTCCCGATGCAAAGCGTTATGAAATTTCCGATTGCTTTAGCCGTTTTGTCTGA<br>GATAGATAAAGGGAATCTTTCTTTTGAACAA                                                                                                                                                                                                                                                                                                                                                                                                                                                                                                                                                                                                                                                                                                                                                                                                                                                                                                                                                                                                                                                                                                                                                                                                                                                                                                                                                                                                                                                                                                                                                                                                      |

|                            |                                                                                                                                                                                                                                                                                                                                                                                                                                                                                                                                                                                                                                                                                                                                                                                                                                                                                                                                                                            |
|----------------------------|----------------------------------------------------------------------------------------------------------------------------------------------------------------------------------------------------------------------------------------------------------------------------------------------------------------------------------------------------------------------------------------------------------------------------------------------------------------------------------------------------------------------------------------------------------------------------------------------------------------------------------------------------------------------------------------------------------------------------------------------------------------------------------------------------------------------------------------------------------------------------------------------------------------------------------------------------------------------------|
| <i>bla<sub>TEM</sub></i>   | GTCACAGAAAAGCATCTTACGGATGGCATGACAGTAAGAGAATTATGCAGTGCTGCCAT<br>AACCATGAGTGATAAACTGCTGCCAACTTAC<br>TTCTGACAACGATCGGAGGACCGAAGGAGC                                                                                                                                                                                                                                                                                                                                                                                                                                                                                                                                                                                                                                                                                                                                                                                                                                           |
| <i>bla<sub>VIM</sub></i>   | ATGTTCAAACCTTTTGAGTAAGTTATTGGTCTATTTGACCGCTCTATCATGGCTATTGCGA<br>GTCCGCTCGCTTTTCCGTAGATTCTAGCGGTG<br>AGTATCCGACAGTCAGCGAAATTCCGGTCCGGGAGGTCCGGCTTTACCAGATTGCCGAT<br>GGTGTTTGGTTCGCATATCGCAACGCAGTCGTTT<br>GATGGCGCAGTCTACCCGTCCAATGGTCTCATTGTCCGTGATGGTGATGAGTTGCTTTTGA<br>TTGATACAGCGTGGGGTGCGAAAAACACAGCG                                                                                                                                                                                                                                                                                                                                                                                                                                                                                                                                                                                                                                                                |
| <i>bla<sub>IMP</sub></i>   | ATGAGCAAGTTATCTGTATTCTTTATATTTTTGTTTTGTAGCATTGCTACCGCAGCAGAGC<br>CTTTGCCAGATTTAAAAAATTGAAAACTTGATGAA<br>GGCGTTTATGTTCACTTCGTTTGAAGAAGTTAACGGGTGGGGCGTTTTTCCTAAACATG<br>GTTTGGTTGTTCTTGTAGATGCTGAAGCTTATCT<br>AATTGACACTCCATTTACGGCTAAAGATACTGAAAAGTTAGTCACTTGTTTTGTGGAACG<br>TGGCTATAAAATAAAAGGCAGTATTTCCTCTCATTT<br>TCATAGTGACAGCACGGGC                                                                                                                                                                                                                                                                                                                                                                                                                                                                                                                                                                                                                                   |
| <i>bla<sub>MOX</sub></i>   | ATGCAACAACGACAATCCATCCTGTGGGGCGCTCTGGCCACCCTGATGTGGGCCGGTCT<br>GGCCCATGCAGGTGAGACTTCACCGGTCGATCCC<br>CTGCGCCCCGTGGTGATGCCAGCATCCGGCCGCTGCTCAAGGAGCACAGGATCCCGGG<br>CATGGCGGTGGCCGTGCTCAAGGATGGCAAGGC<br>CCACTATTTCAACTACGGTGTGGCCGATCGGGAGCGCGCAGTCGGTGTGAGCGAGCAGA<br>CCCTGTTGAGATAGGCTCCGTGAGCAAGCCCCT<br>GACCGCGACCCTAGGAGCCTATGCGGTGGTCAAGGGAGCGATGCAACTGGATGACAAG<br>GCGAGCCGGCACGCCCCCTGGCTCAAGGGATCCG<br>CCTTTGACAGCATCACCATGGGGGAGCTGGCTACCTACAGCGCGGGCGGCTTGCCGCTG<br>CAATTCCTCCGAGGAGGTGGATTGCTCGAGAAGA<br>TGCAGGCCTACTACCGCCAGTGACCCCGAGCCTACTCGCCGGGTTCCTATCGCCAGTACT<br>CTAACCCAGCATAGGGCTGTTGCGCCACCTGG<br>CGGCGAGCAGCATGAAGCAGCCGTTTGCCAGTTGATGGAGCAGACGCTCCTGCCGGGG<br>CTTGGCCTGCACCACAC                                                                                                                                                                                                                                                                   |
| <i>bla<sub>SHVII</sub></i> | TTAGCGTTGCCAGTGCTCGATCAGCGCCGCGCCGATCCCGGCGATTTGCTGATTTGCTC<br>GGCCATGCTCGCCGGCGTATCCCGCAGA<br>TAAATCACCACAATGCGCTCTGCTTTGTTATTGCGGGCCAAGCAGGGCGACAATCCCGCGC<br>GCACCCCGCTTGCTAGC-TCCGGTCTTATC<br>GGCGATAAAC-<br>CAGCCCGCCGGCAGCACGGAGCGGATCAACGGTCCGGCGACCCGATCGTCCACCATCC<br>ACTGCAGCAGCTGCCGTTG<br>CGAACGGGCGCTCAGACGCTGGCTGGTCAGCAGCTTGCGCAGGGTCGCGGCCATGCTGG<br>CCGGGGTAGTGGTGTGCGGGGCGTCGC<br>CGGGAAGCGCCTATTCAATTCCGTTTCCAGCGGTCAAGGCGGGTGACGTTGTGCGCCGA<br>TCTGGCGCAAAAAGGCAGTCAATCCTGCG<br>GGGCCGCCGACGGTGGCCAGCAGCAGATTGGCGGCGCTGTTATCGCTCATGGTAATGGC<br>GGCGGCGCAGAGTTCGCCGACCGTCATGC<br>CGTCGGCAAGGTGTTTTTCGCTGACCGGCGAGTAGTCCACCAGATCCTGCTGGCGATAGT<br>GGATCTTTGCTCCAGCTGTTGCTACCGG<br>CATCCACCCGCGCCAGCACTGCGCCGAGAGCACTACTTTAAAGGTGCTCATCATGGGA<br>AAGCGTTCATCGGCGCGCCAGGCGGTGAGC<br>GTGCGGCCGCTGGCCAGATCCATTTCTATCATGCCTACGCGGCCCGACAGCTGGCTTTG<br>CTTTGTTTAATTTGCTCAAGCGGCTGCGGG<br>CTGGCGTGTACCGCCAGCGGCAGGGTGGCTAACAGGGAGATAATACACAGGCGAATAT<br>AACGCAT |

|                              |                                                                                                                                                                                                                                                                                                                                                                                                                                                                     |
|------------------------------|---------------------------------------------------------------------------------------------------------------------------------------------------------------------------------------------------------------------------------------------------------------------------------------------------------------------------------------------------------------------------------------------------------------------------------------------------------------------|
| <i>bla<sub>oxA</sub></i>     | ATGAACATTAAAGCACTCTTACTTATAACAAGCGCTATTTTTATTTACAGCTGCTCACCTT<br>ATATAGTGACTGCTAATCCAAATCACAGCGC<br>TTCAAAATCTGATGTAAAAGCAGAGAAAATTAATAATTTATTTAACGAAGCACACACTA<br>CGGGTGTTTTAGTTATCCAACAAGGCCAAACTC<br>AACAAAGCTATGGTAATGATCTTGCTCGTGCTT                                                                                                                                                                                                                           |
| <i>bla<sub>CTX-M-1</sub></i> | TGCACCGGTGGTATTGCCTTTCATCCATGTCACCAGCTGCGCCCGTTGGCTGTCGCCCAAT<br>GCTTTACCCAGCGTCAGATTCCGCAGAGT<br>TTGCGCCATTGCCCG                                                                                                                                                                                                                                                                                                                                                   |
| <i>ermB</i>                  | ATGAACAAAAATATAAAATATTCTCAAAACTTTTTAACGAGTGAAAAAGTACTCAACCA<br>AATAATAAAACAATTGAATTTAAAAGAAACCGATA<br>CCGTTTACGAAATTGGAACAGGTAAAGGGCATTTAACGACGAAACTGGCTAAAATAAGT<br>AAACAGGTAACGTCTATTGAATTAGACAGTCAT<br>CTATTCAACTTATCGTCAGAAAAATTAATACTGAATACTCGTGTCATTTAATTCACCAA<br>GATATTCTACAGTTTCAATTCCTAACAAACAGA<br>GGTATAAAATTGTTGGGAATATTCCTTACCATTTAAGCACACAAATTATTAATAAAAGTGG<br>TTTTTGAAAGCCATGCGTCTGACATCTATCTGA<br>TTGTTGAAGAAGGATTCTACAAGCGTACCTTGGATATTCACC      |
| <i>ermF</i>                  | TGAAAACGACACAGCTTTGGTTGAACATTTACGAAAATTATTTTCTGATGCCCCGAAATGT<br>TCAAGTTGTCGGTTGTGATTTTAGGAATTTTGC<br>AGTCCG                                                                                                                                                                                                                                                                                                                                                        |
| <i>ermT</i>                  | AATACAAATCGTTCAGTACTATTTTTAATGACAGAAGTTGATATATCCATATTAAGT<br>AAAATCCCTAGAGAATACTTTCATCCAAAACCTAG<br>AGTTAATAGCTCGTTAATTGTATTAAAAAGACACCCTTCAAAAATATCA                                                                                                                                                                                                                                                                                                               |
| <i>ermX</i>                  | GATGATGACGGCTCAGTGGTCCCCATGGTTCACATTTACCTGGGTCTCGGGTACCAAG<br>GTCTGCTTTCCGGCCACAGCCAAACGTTGACG<br>GGGGGATCTTAGTGATC                                                                                                                                                                                                                                                                                                                                                 |
| <i>erm35</i>                 | GAATTCAGTATTCACCTGTAAGAAGTAAATAATGACAAAAAAGAAATTGCCCGTTTCGT<br>TTTACGGGTCAGCACTTTACTATTGACAAAGTGCTT<br>ATTAAAGATGCAATAAAAGAATCAAATATAAATCAACACGATACAGTTTTAGATATTGG<br>AGCTGGTAAGGGTTTTCTAACTGTTTCATCTCTTAAAA<br>AATGTCGATAAAAGTTATTGCCATTGAAAACGATGTTGCATTAAGTCAACATTTGCGCAAA<br>AAATTCATTACGCTCAAAACGTTCAAGTGGTTAG<br>TTGTGATTATAGAAATTTTGTGGTTCCGAAAGTTCCATTTAAAGTAGTTTCAAATATTCT<br>TTTGGTATTACATCTGATATTTTGTAGTCTGATG<br>TTTGAAAATGTCGAATATTTTCTATGCGGTTCAATTAT |
| <i>tet32</i>                 | TAATCCCATGCCATTACTTCGGACAACGGTAGAGCCGCAAAAGCCGGAGCAAAGGGAA<br>GCCCTGTAAATGCCCTCACAGAGATTGCTGATACAGA                                                                                                                                                                                                                                                                                                                                                                 |
| <i>tetA</i>                  | ACTGGCGGCGCTCACCAGCCTGACCTCGATCGTCGGACCCCTCCTCTCACGGCGATCTA<br>TGCGGCTTCTATAACAACGTGGAACGGGTGG                                                                                                                                                                                                                                                                                                                                                                      |
| <i>tetL</i>                  | AGCACTCGTAATGGTTGTAGTTGCGCGCTATATTCCAAAGGAAAATAGGGGTAAAGCAT<br>TTGGTCTTATTGGATCGATAGTACCATGGGAGAA<br>GGAGTCGGTCCAGCGATTGGTGGAATG                                                                                                                                                                                                                                                                                                                                    |
| <i>tetO</i>                  | GCAGGAAAGACAACATTAACGGAAAGTTTATTGTATACCAGTGGTGCAATTGCAGAACT<br>AGGGAGCGTAGATGAAGGCACAACAAGGACAGAT<br>ACAATGAATTTGGAGCGTCAAAGGGGAATCA                                                                                                                                                                                                                                                                                                                                |
| <i>tetQ</i>                  | GTAAAGACTACGCCTCAGAAGTAAGTTCATACACTAAGGGCTTAGGCGTTTTATGGTCA<br>AGCCATGCGGGTATCAAATAACAAAAGGCGATTA<br>TTCTGATAATATCCGCATGAACGAAAAAGATAAA                                                                                                                                                                                                                                                                                                                             |
| <i>tetS</i>                  | TATCAAGATATTAAGGACAACTTTCTGACGACATCATAATTAAGCAGACTGTGAATCTA<br>AATTTGAAACCTTATGTAATAGATTATACTGAACCA<br>GAACAATGGGAGACAGTAATTGTGG                                                                                                                                                                                                                                                                                                                                    |

|               |                                                                                                                                                                                                                                                                                                                                                                                                        |
|---------------|--------------------------------------------------------------------------------------------------------------------------------------------------------------------------------------------------------------------------------------------------------------------------------------------------------------------------------------------------------------------------------------------------------|
| <i>tetW</i>   | CCCTGCGGAAAATGAACATTCCCACCGTTATCTTTATCAACAAGATCGACCAGGTTGGCG<br>TTGATTTGCAGGGCGTGTATCAGTCTGTTCCGG<br>ATAAGCTCTCCGCCGATATTATCATCAAG                                                                                                                                                                                                                                                                     |
| <i>tetX</i>   | GTTTCCATTGCATAGCTGAAAAAATCCAGGACAGTTTATCTCTGGTTGATGAATATCGGC<br>TTGTATATTGAAAGTACCTGTTTCTTCAACTTCCG<br>TGTCGGTAACAAATTTTCTTACCTTG                                                                                                                                                                                                                                                                      |
| <i>tetM</i>   | ATGGAGGAAAATCACATGAAAATTATTAATATTGGAGTTTATAGCTCATGTTGATGCGGGA<br>AAAACCTACCTTAACAGAAAGCTTATTATATAACAGT                                                                                                                                                                                                                                                                                                 |
| <i>vanA</i>   | TCACCCCTTTAACGCTAATACGATCAAGCGGTCAATCAGTTCGGGAAGTGCAATACCTGC<br>AGCGGCCATCATACGGGGATAACGACTGTATGA<br>CGTGAAACCGGGCAGAGTATTGACTTCG                                                                                                                                                                                                                                                                      |
| <i>vanB</i>   | GATGATTTGATTGTCGGCGAAGTGGATCAAATCCGGTTGAGCCACGGTATCTTCCGCATC<br>CATCAGGAAAACGAGCCGGAAAAAGGCTCAGAGAATGC                                                                                                                                                                                                                                                                                                 |
| <i>vanRA</i>  | TGCTGAAATATTTCGTCGCCCCATATCTCATGAAATAGCAGCTCGGAGCTAACCACATTCC<br>CCTTGTTTTACAGAGGATTTCGCAGTATTGAAAAAC<br>TCGGTGGGAGTAAGGGATAACTGCTT                                                                                                                                                                                                                                                                    |
| <i>vanSA</i>  | TATTCTATGTCGCGTCATGCTTTCAAATTCGAAAATACTTTGACGAGATAAATACCGG<br>CATTGATGTACTTATTCAGAACGAAGATAAACAAA<br>TTGAGCTTCTGCGGAAATGGATGTT                                                                                                                                                                                                                                                                         |
| <i>sul1</i>   | ATGGTGACGGTGTTTCGGCATTCTGAATCTCACCGAGGACTCCTTCTTCGATGAGAGCCGG<br>CGGCTAGACCCCGCCGGCGCTGTCACCGCG<br>GCGATCGAAATGCTGCGAGTCGGATCAGACGTCGTGGATGTCGGACCGGCCGCCAGCCA<br>TCCGGACGCGAGGCCTGTATCGCCG                                                                                                                                                                                                            |
| <i>sul2</i>   | ATGAATAAATCGCTCATCATTTTTCGGCATCGTCAACATAACCTCGGACAGTTTCTCCGAT<br>GGAGGCCGGTATCTGGCGCCAGACGCAGCC<br>ATTGCGCAGGCGCGTAAGCTGATGGCCGAGGGGGCAGATGTGATCGACCTCGGTCCGGC<br>ATCCAGCAATCCCGACGCGCGCCTGTTT<br>CGTCCGACACAGAAATCGCGCGTATCGCGCCGGTGCTGGACGCGCTCAAGGCAGATGGC<br>ATTCCCGTCTCGCTCGACAGTTATCAACCC<br>GCGACGCAAGCCTATGCCTTGTCGCGTGGTGTGGCCTATCTCAATGATATTTCGCGGTTTTTC<br>CAGACGCTGCGTTCTATCCGCAATTGGCGAAA |
| <i>qnrB</i>   | TTAACCCATGACAGCGATACCAAGACGTTCCAGGAGCAACGATGCCTGGTAGCTGTCCA<br>GTTTGACGCCTTGCAAATCAACCCCGC                                                                                                                                                                                                                                                                                                             |
| <i>mcr-1</i>  | ATGGCACGGTCTATGATACGACCATGCTCCAAAATGCCCTACAGACCGACCAAGCCGAG<br>ACCAAGGATCTATTAAACGCAGCGTTATCA<br>TGCGTATCATTGGTTTGGGTGTGCTACCAAGTTTGCTTGTGGCTTTTGTTAAGGTGGATTAT<br>CCG                                                                                                                                                                                                                                 |
| <i>is26</i>   | TTACATTTCAAAAACCTCTGCTTACCAGGCGCATTTCGCCCAGGGGATCACCATAATAAAA<br>TGCTGAGGCCTGGCCTTTGCGTAGTG<br>CACGCATCACCTCAATACCTTTGATGGTGGCGTAAGCCGTCTTCATGGATTAAATCCCA<br>GCGTGGCGCCGATTATCCGTTTCAGT<br>TTGCCATGATCGCATTCAATCACGTTGTTT                                                                                                                                                                             |
| <i>tnpA</i>   | TTTATCGTGCAATTGATGCGGACGGCTTAACCTTAGATATCTGGTTACGAAAGAAATGGG<br>ATACGCAAGCAGCCTATGCTTTCTTAA<br>AACGACTCCATAAACAGTTTGGTGAGCCGAAAGCA                                                                                                                                                                                                                                                                     |
| <i>int1-A</i> | ATGAAAACCGCCACTGCGCCGTTACCACCGCTGCGTTCGGTCAAGGTTCTGGACCAGTTG<br>CGTGAGCGCATACGCTACTTGCAATT<br>ACAGCTTACGAACCGAACAGGCTTATGTCCACTGGGTTCGTGCCTTCATCCGTTTCCACG<br>GTGTGCGTCACCCGGCAACCTTGGGCAGCAG                                                                                                                                                                                                          |
